# Supplementary material for: Towards effective wildlife protection law for marine species in China: A stakeholders’ perspective
Source: Frontiers journal article supplement (doi:10.3389/fmars.2023.1055634), 2023-02-20
Supplement: Data_Sheet_1.doc [file Data_Sheet_1.doc]

**Towards Effective Wildlife Protection Laws for Marine Species in China: A Stakeholders’ Perspective**

Kit Yue Kwan, Ruifang Chen, Chun-Chieh Wang, Shuhao Lin, Lv Wu, Xiaoyong Xie, Zhaohong Weng, Menghong Hu, Haichao Zhou, Zhou Wu, Yijian Fu, Wenquan Zhen, Xin Yang and Yulong Wen

**Supplementary Table 1.** Dimension, categories, and main content of the questionnaire on the Wildlife Protection Law for marine species (mWPL). Numbers in the parentheses represent the scoring for each option, except those describing the age range of respondents. O and X in the parentheses mean that the option is correct and wrong, respectively. Roman numerals in the parentheses are the protection levels of marine wildlife under the latest version of mWPL issued in China, in which I and II represent the Class I and II national key protected animals, respectively. *: multiple choices that allow unlimited choices. #: multiple choices that allow up to three choices. @: the response was optional

| Dimension | Category | Content |
| --- | --- | --- |
| Sociodemographic factors | Sex | male or female |
|  | Age (years old) | minor (< 18), youth (18–35), prime (36–49), middle age (50–65), or elder (> 65) |
|  | Birthplace | city |
|  | Coastal city of residence | the coastal city that a respondent lives in or had lived in (for at least two years) |
|  | Education level | no formal, elementary school, high school, undergraduate, or graduate |
|  | Major | biology/ecology, fishery management, aquaculture, environmental science, law, or others |
|  | Occupation | government employee, law enforcement officer, nongovernment employee, fisher, farmer, freelancer/self-employed, retiree, nongovernmental organization staff, student, and others |
| Exposure to mWPL | Source* | media (1), official document (1), family/friend/peer (1), others (1), or none (0) |
|  | News reporting frequency | often (3), seldom (2), once (1), or never (0) |
|  | Sighting of enforcement activity | often (3), seldom (2), once (1), or never (0) |
| Understanding of mWPL | Where to report illegality* | Police Station (O), Fishery Administration (O), Bureau of Animal Husbandry and Veterinary (X), Forestry Bureau (X), Administration of Market Regulation (O), or Administration of Protected Area/Reserve (X) |
|  | Possible penalty* | verbal/written warning (X), fine (O), or relevant criminal responsibility (O) |
|  | Identification of act of illegality from case examples* | referring to Supplementary Table 2 (only the first act to be legal) |
| Perspective toward mWPL | Necessity of legislation | quite necessary (2), necessary (1), no idea (0), unnecessary (-1), or quite unnecessary (-2) |
|  | Effectiveness of legislation | very effective (2), effective (1), no idea (0), ineffective (-1), or very ineffective (-2) |
|  | Opinion on imposed legal punishment in a previous case | much agreed (2), agreed (1), no idea (0), disagreed (-1), or much disagreed (-2) |
|  | Extent of obeying the law: oneself | much agreed (2), agreed (1), no idea (0), disagreed (-1), or much disagreed (-2) |
|  | Extent of obeying the law: family and peers | much agreed (2), agreed (1), no idea (0), disagreed (-1), or much disagreed (-2) |
|  | Impact of stricter enforcement* | job/income, health, family/social relationship, others, or none |
|  | Whistle-blowing on possible illegal act | named, anonymous, or not |
|  | Reason for no whistle-blowing@ | not one’s business, not in trouble, no idea, or no response |
|  | Approach to improving wildlife protection# | to issue new/more laws and regulations, to include more species under protection, to build more protected areas/reserves, to enhance law enforcement, to strengthen the legal punishment, to improve education/public awareness, to improve engagement of local communities, others, current state is perfect |
| Illegal marine wildlife exploitation@ | Exploitation: oneself/others | harvested, sold, bought, consumed, utilized, kept, or transported any listed marine wildlife and relevant products |
|  | Purpose of use: oneself/others* | traditional Chinese medicine, business, food, pet/ornament, or others |

**Supplementary Table 2.** Survey questionnaire delivered to citizens from coastal cities in China to gather baselines about the exposure, understanding, and perspective toward the Wildlife Protection Law for marine species (mWPL)

1. **Basic sociodemographic information**
   1. Sex:

□ male

□ female

- 1. Age (years old):

□ < 18

□ 18–35

□ 36–49

□ 50–65

□ > 65

- 1. Birthplace:

______ province/region/municipality ______ city

- 1. Coastal city of residence (for at least two years):

______ province/region/municipality ______ city

- 1. Education level:

□ no formal (proceed to question 1.7)

□ elementary school (proceed to question 1.7)

□ high school (proceed to question 1.7)

□ undergraduate

□ graduate

- 1. Major:

□ biology/ecology

□ fishery management

□ aquaculture

□ environmental science

□ law

□ others

- 1. Occupation:

□ government employee

□ law enforcement officer

□ nongovernment employee

□ fisher

□ farmer

□ freelancer/self-employed

□ retiree

□ nongovernmental organization staff

□ student

□ others

1. **Exposure to mWPL**
   1. What is/are your primary source(s) to acquire information about mWPL? (multiple, unlimited choices)

□ media

□ official document

□ family/friend/peer

□ others

□ none

- 1. Which level of news reporting frequency on local law enforcement activity in your current place of residence do you perceive?

□ often

□ seldom

□ once

□ never

- 1. Which level for sighting an on-site law enforcement activity do you perceive?

□ often

□ seldom

□ once

□ never

1. **Understanding of mWPL**
   1. If you encounter someone selling the Chinese white dolphin (*Sousa chinensis*), China’s Class I national key protected animal, in market, where should you report illegality? (multiple, unlimited choices):

□ Police Station

□ fishery administration

□ Bureau of Animal Husbandry and Veterinary

□ Forestry Bureau

□ Administration of Market Regulation

□ Administration of Protected Area/Reserve

- 1. A fisher had been accused of slaughtering and selling a finless porpoise (*Neophocaena* spp.), China’s Class I national key protected animal, in a market of Zhanjiang, Guangdong in March 2019. Which is the possible penalty for the fisher? (multiple, unlimited choices)

□ a verbal or written warning

□ a fine (> 2 times but < 5 times) according to the illegal gains

□ the relevant criminal responsibilities

- 1. Which of the following act(s) did not obey the mWPL? (multiple, unlimited choices)

□ Xiaoshuai witnessed someone selling a finless porpoise (*Neophocaena* spp.) in the market. He reported the illegality to responsible administrations.

□ Shangjia saw a sea turtle in the market. He bought the sea turtle and released it to the sea.

□ Fuhei collected a dead red coral unexpectedly during a field survey for fish biodiversity. He then brought the coral back to his home as an ornament.

□ Feiyang went for a barbecue and enjoyed a dish of grilled Chinese sturgeon (*Acipenser sinensis*).

□ Zhazha bought some dried seahorses for making his soup.

□ Haozi sold the bycaught Chinese bahaba (*Bahaba taipingensis*) in his WeChat groups.

□ Fengbing bought a specimen of nautilus during his vacation in Malaysia and brought the specimen back to China, giving one of his best friends as a birthday gift.

1. **Perspective toward mWPL**
   1. Do you think the implementation of the mWPL is necessary?

□ quite necessary

□ necessary

□ no idea

□ unnecessary

□ quite unnecessary

- 1. Do you think that the mWPL is effective for marine wildlife protection?

□ very effective

□ effective

□ no idea

□ ineffective

□ very ineffective

- 1. The 18 defendants who illegally harvested and sold stony corals Scleractinia were sentenced to the highest 13 months imprisonment and a 2,000–20,000 Chinese Yuan fine by the Primary People's Court of Yuexiu District of Guangzhou City in December 2018. Do you agree with the degree of legal punishment under the mWPL?

□ much agreed

□ agreed

□ no idea

□ disagreed

□ much disagreed

- 1. Do you agree that you are an obedient person to the mWPL?

□ much agreed

□ agreed

□ no idea

□ disagreed

□ much disagreed

- 1. Do you agree that your families, friends, and/or peers obedient people to the mWPL?

□ much agreed

□ agreed

□ no idea

□ disagreed

□ much disagreed

- 1. What would be the impact given that stricter law enforcement under the mWPL is imposed? (multiple, unlimited choices)

□ job/income

□ health

□ family/social relationship

□ others

□ none

- 1. If you encounter possible illegal acts under the mWPL, will you blow the whistle?

□ yes, with my name

□ yes, anonymously

□ no (proceed to question 4.8)

- 1. If you will not blow the whistle for possible illegal acts in the previous question, what would be the reason? (optional)

□ not my business

□ not to be in trouble

□ no idea about where to report illegality

□ lack of feedback from responsible administrations

- 1. Which approach(s) in your perspective will improve marine wildlife protection in China? (multiple choices, up to three choices)

□ to issue new/more laws and regulations

□ to include more species under protection

□ to build more protected areas/reserves

□ to enhance law enforcement

□ to strengthen the legal punishment

□ to improve education/public awareness

□ to improve engagement of local communities

□ others

□ current state is perfect

1. **Illegal marine wildlife exploitation under mWPL (optional)**
   1. Have you ever exploited (including harvested, sold, bought, consumed, utilized, kept, or transported) any listed marine wildlife and relevant products?

□ giant clams

□ seahorses

□ marine mammals

□ sea turtles

□ lancelets

□ corals

□ nautilus

□ horseshoe crabs

□ Chinese bahaba

- 1. What is your purpose for exploiting the aforementioned marine wildlife and relevant products? (multiple, unlimited choices)

□ as traditional Chinese medicine

□ for business

□ as food

□ as pet/ornament

□ others

- 1. Have your families, friends, and/or peers ever exploited (including harvested, sold, bought, consumed, utilized, kept, or transported) any listed marine wildlife and relevant products?

□ giant clams

□ seahorses

□ marine mammals

□ sea turtles

□ lancelets

□ corals

□ nautilus

□ horseshoe crabs

□ Chinese bahaba

- 1. What is their purpose for exploiting the aforementioned marine wildlife and relevant products? (multiple, unlimited choices)

□ as traditional Chinese medicine

□ for business

□ as food

□ as pet/ornament

□ others
